# Supplementary material for: Theoretical fingerprinting of the photophysical properties of four firefly bioluminophores
Source: Royal Society of Chemistry journal article supplement (doi:10.1039/c3pp50203a), 2013-08-30
Supplement: c3pp50203a.pdf [file c3pp50203a.pdf]

# Theoretical Fingerprinting of the Photophysical Properties of Four Firefly Bioluminophores

Luís Pinto da Silva and Joaquim C.G. Esteves da Silva\*

*Centro de Investigação em Química, Departamento de Química e Bioquímica,  
Faculdade de Ciências da Universidade do Porto  
R. Campo Alegre 687 4169-007 Porto, Portugal*

\*Corresponding author: Joaquim C.G. Esteves da Silva

e-mail: jcsilva@fc.up.pt; Tel: 351 226082869; Fax: 351 226082959

## Supplementary Data:

**Table S1.** Cartesian geometries of firefly oxyluciferin, obtained at the PBE0/cc-pVDZ level of theory.

**Table S2.** Cartesian geometries of BtOxyLH<sub>2</sub>, obtained at the PBE0/cc-pVDZ level of theory.

**Table S3.** Cartesian geometries of AminoSeOxyLH<sub>2</sub>, obtained at the PBE0/cc-pVDZ level of theory.

**Table S4.** Cartesian geometries of CALOxyLH<sub>2</sub>, obtained at the PBE0/cc-pVDZ level of theory.

**Table S1.** Cartesian geometries of firefly oxyluciferin, obtained at the PBE0/cc-pVDZ level of theory.

|   |          |          |          |
|---|----------|----------|----------|
| O | -5.54538 | -0.54778 | 0.00002  |
| C | -4.35505 | -0.18775 | 0.00000  |
| C | -3.24556 | -1.12324 | 0.00003  |
| C | -1.95169 | -0.66382 | 0.00001  |
| C | -1.62761 | 0.74139  | -0.00003 |
| C | -2.69992 | 1.67924  | -0.00006 |
| C | -3.98864 | 1.23617  | -0.00004 |
| N | -0.32788 | 1.05299  | -0.00004 |
| C | 0.43583  | -0.02830 | 0.00002  |
| S | -0.45081 | -1.56686 | 0.00003  |
| C | 1.84716  | 0.01652  | 0.00004  |
| S | 2.62134  | 1.63226  | -0.00002 |
| C | 4.22621  | 0.80956  | 0.00016  |
| C | 3.96107  | -0.71207 | -0.00002 |
| N | 2.62544  | -1.03725 | 0.00007  |
| O | 4.88525  | -1.50252 | -0.00022 |
| H | -3.48959 | -2.18721 | 0.00006  |
| H | -2.45200 | 2.74393  | -0.00009 |
| H | -4.82920 | 1.93524  | -0.00007 |
| H | 4.81451  | 1.07369  | 0.89170  |
| H | 4.81493  | 1.07391  | -0.89102 |

**Table S2.** Cartesian geometries of BtOxyLH<sub>2</sub>, obtained at the PBE0/cc-pVDZ level of theory.

|   |          |          |          |
|---|----------|----------|----------|
| O | -5.56441 | -0.72588 | 0.00000  |
| C | -4.40211 | -0.28344 | -0.00001 |
| C | -3.22818 | -1.13573 | -0.00002 |
| C | -1.96711 | -0.59210 | -0.00002 |
| C | -1.73771 | 0.82866  | 0.00000  |
| C | -2.87709 | 1.68713  | 0.00003  |
| C | -4.13414 | 1.16160  | 0.00002  |
| C | -0.38395 | 1.15518  | 0.00000  |
| C | 0.47704  | 0.05599  | 0.00003  |
| S | -0.43746 | -1.46113 | -0.00001 |
| C | 1.88012  | 0.04553  | 0.00008  |
| S | 2.76481  | 1.62248  | -0.00010 |
| C | 4.31916  | 0.71495  | 0.00011  |
| C | 3.96349  | -0.79106 | 0.00002  |
| N | 2.61807  | -1.04136 | 0.00008  |
| O | 4.85052  | -1.62479 | -0.00009 |
| H | -3.39553 | -2.21482 | -0.00003 |
| H | -2.72200 | 2.77096  | 0.00004  |
| H | -5.01912 | 1.80366  | 0.00003  |
| H | 4.91963  | 0.94507  | 0.89265  |
| H | 4.91996  | 0.94515  | -0.89217 |
| H | -0.01316 | 2.18284  | 0.00002  |

|    |          |          |          |
|----|----------|----------|----------|
| N  | 5.94429  | 0.42013  | -0.05827 |
| C  | 4.60754  | 0.08513  | -0.00190 |
| C  | 3.62001  | 1.07700  | -0.00348 |
| C  | 2.28345  | 0.68551  | -0.00639 |
| C  | 1.90189  | -0.68110 | -0.00427 |
| C  | 2.90548  | -1.66549 | -0.00175 |
| C  | 4.22903  | -1.28413 | -0.00187 |
| N  | 0.55648  | -0.91546 | -0.00224 |
| C  | -0.10222 | 0.20589  | -0.00291 |
| S  | 0.85888  | 1.68012  | -0.00632 |
| C  | -1.54856 | 0.27621  | -0.00052 |
| Se | -2.51538 | -1.36966 | 0.00100  |
| C  | -4.07276 | -0.21361 | 0.00399  |
| C  | -3.58103 | 1.24312  | 0.00359  |
| N  | -2.18512 | 1.39426  | 0.00082  |
| O  | -4.35108 | 2.16901  | 0.00574  |
| H  | 3.89887  | 2.13226  | -0.00583 |
| H  | 2.61892  | -2.71792 | 0.00109  |
| H  | 5.01324  | -2.04465 | -0.00596 |
| H  | -4.68957 | -0.38813 | 0.89637  |
| H  | -4.69172 | -0.38702 | -0.88761 |
| H  | 6.18262  | 1.35522  | 0.24820  |
| H  | 6.59067  | -0.27906 | 0.28571  |

|   |          |          |          |
|---|----------|----------|----------|
| C | 2.03558  | -0.04555 | 0.00152  |
| S | 2.63711  | -1.68400 | 0.42325  |
| C | 4.30987  | -1.11985 | 0.08291  |
| C | 4.21044  | 0.36729  | -0.30400 |
| N | 2.89712  | 0.85328  | -0.31873 |
| O | 5.18432  | 1.01936  | -0.57587 |
| H | 4.76371  | -1.68313 | -0.74499 |
| H | 4.94584  | -1.22757 | 0.97259  |
| C | 0.59301  | 0.17388  | 0.04366  |
| C | -0.28162 | -0.87420 | -0.06782 |
| C | -1.68588 | -0.68698 | -0.07059 |
| C | 0.07917  | 1.54300  | 0.20552  |
| O | -1.31593 | 1.67014  | 0.17713  |
| O | 0.70181  | 2.54739  | 0.37916  |
| C | -2.16578 | 0.63351  | 0.04687  |
| C | -2.63214 | -1.72447 | -0.19962 |
| C | -3.98190 | -1.46021 | -0.20813 |
| C | -4.45045 | -0.12618 | -0.08978 |
| C | -3.52305 | 0.91805  | 0.03717  |
| N | -5.79048 | 0.13534  | -0.14592 |
| H | 0.10856  | -1.88961 | -0.18611 |
| H | -2.27695 | -2.75313 | -0.29228 |
| H | -4.70269 | -2.27372 | -0.31109 |
| H | -3.84352 | 1.95667  | 0.12869  |
| H | -6.42876 | -0.62880 | 0.02777  |
| H | -6.11148 | 1.03806  | 0.17641  |
